# Supplementary material
Source: publisher figshare collection journal article supplement (https://tandf.figshare.com/ndownloader/files/17722730)
Supplement: Supplementary file 1 [file 17722730]

## Supplementary Data

eFigure 1: Flowchart - Derivation Cohort

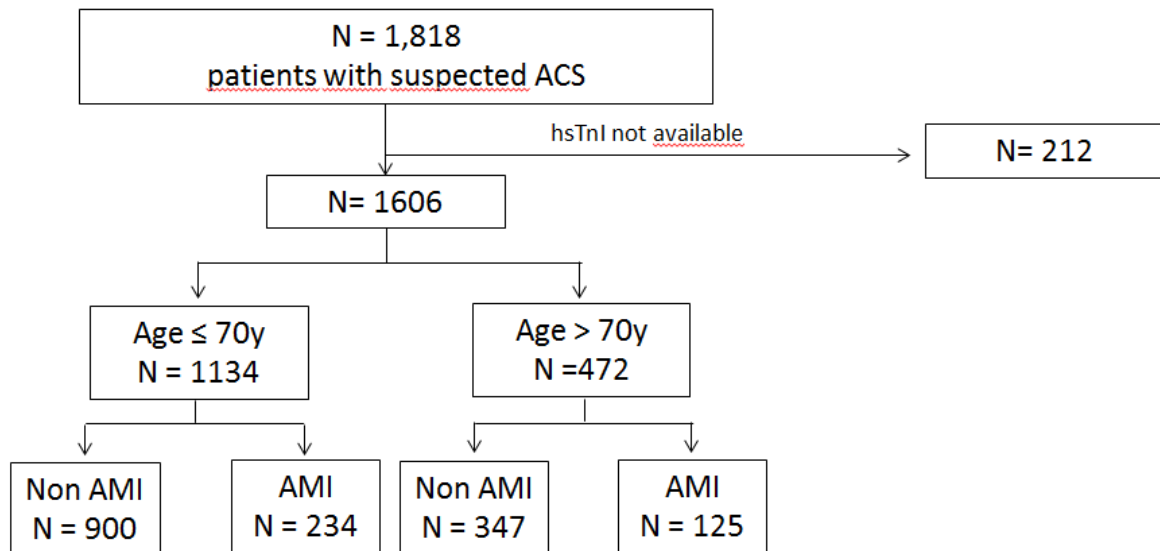

eFigure 1: Flowchart representing the process of the selection of patients in the derivation cohort.

**eFigure 2: Flowchart –Validation Cohort for hs-cTnl**

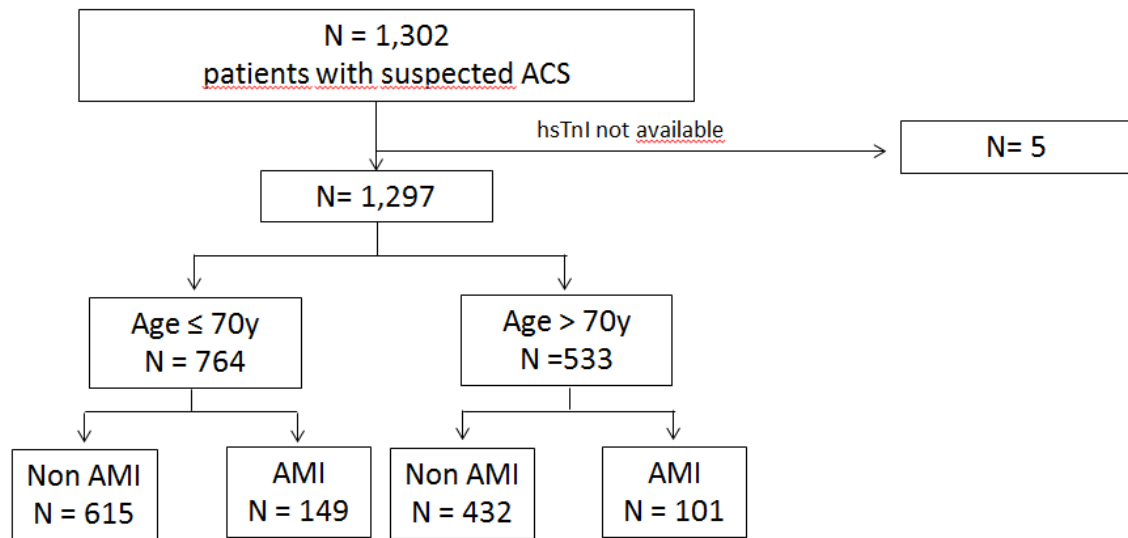

**eFigure 2:** Flowchart representing the process of the selection of patients in the validation cohort for hs-cTnl.

**Supplementary Table 1. Troponin I Cut-Offs Upon Admission in Elderly Patients – Stratified by Sex**

|                                                    | hs-cTnI   | Sensitivity  | Specificity  |
|----------------------------------------------------|-----------|--------------|--------------|
|                                                    | Cut-off   | (CI)         | (CI)         |
| <b>Women (n = 178)</b>                             |           |              |              |
| <b>Age &gt; 70 y</b> 99 <sup>th</sup> percentile   | 26.2 ng/L | 0.88         | 0.86         |
|                                                    |           | (0.73, 0.97) | (0.79, 0.91) |
| <b>Age &gt; 70 y</b> Specificity optimized cut-off | 44.6 ng/L | 0.82         | 0.92         |
|                                                    |           | (0.65, 0.93) | (0.86, 0.96) |
| <b>Age &gt; 70 y</b> Youden optimized cut-off      | 36.6 ng/L | 0.85         | 0.9          |
|                                                    |           | (0.69, 0.95) | (0.84, 0.95) |
| <b>Men (n = 294)</b>                               |           |              |              |
| <b>Age &gt; 70 y</b> 99 <sup>th</sup> percentile   | 26.2 ng/L | 0.9          | 0.84         |
|                                                    |           | (0.82, 0.95) | (0.78, 0.89) |
| <b>Age &gt; 70 y</b> Specificity optimized cut-off | 44.6 ng/L | 0.87         | 0.89         |
|                                                    |           | (0.78, 0.93) | (0.83, 0.93) |
| <b>Age &gt; 70 y</b> Youden optimized cut-off      | 36.6 ng/L | 0.88         | 0.89         |
|                                                    |           | (0.79, 0.94) | (0.83, 0.93) |

Diagnostic performance of the 99<sup>th</sup> percentile as well as the derived sex pooled cut off levels stratified by sex

Abbreviations: CI, 95% confidence interval; hs-cTnI, high-sensitivity cardiac troponin I
